# Supplementary material
Source: HighWire-hosted journal article supplement (https://erj.ersjournals.com/content/57/3/2002872)
Supplement: inline-supplementary-material-1 [file inline-supplementary-material-1.pdf]

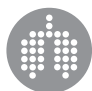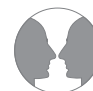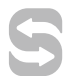

SHAREABLE PDF

# Leukocyte telomere length and mycophenolate therapy in chronic hypersensitivity pneumonitis

Ayodeji Adegunsoye<sup>1,2,9</sup>, Julie Morisset<sup>3,9</sup>, Chad A. Newton<sup>4</sup>, Justin M. Oldham<sup>5</sup>, Eric Vittinghoff<sup>6</sup>, Angela L. Linderholm<sup>5</sup>, Mary E. Strek<sup>1</sup>, Imre Noth<sup>7</sup>, Christine Kim Garcia<sup>8</sup>, Paul J. Wolters<sup>6</sup> and Brett Ley<sup>6</sup>

**Affiliations:** <sup>1</sup>Section of Pulmonary and Critical Care, Dept of Medicine, The University of Chicago, Chicago, IL, USA. <sup>2</sup>Committee on Genetics, Genomics and Systems Biology, The University of Chicago, Chicago, IL, USA. <sup>3</sup>Dept of Pulmonary Medicine, Centre Hospitalier de l'Université de Montréal, Montréal, QC, Canada. <sup>4</sup>Division of Pulmonary and Critical Care Medicine, Dept of Internal Medicine, University of Texas Southwestern, Dallas, TX, USA. <sup>5</sup>Division of Pulmonary, Critical Care and Sleep Medicine, Dept of Medicine, University of California at Davis, Davis, CA, USA. <sup>6</sup>Section of Pulmonary and Critical Care Medicine, Dept of Medicine, University of California San Francisco, San Francisco, CA, USA. <sup>7</sup>Pulmonary and Critical Care Medicine, University of Virginia, Charlottesville, VA, USA. <sup>8</sup>Division of Pulmonary, Allergy and Critical Care Medicine, Columbia University Medical Center, New York, NY, USA. <sup>9</sup>These authors contributed equally.

**Correspondence:** Ayodeji Adegunsoye, Section of Pulmonary and Critical Care, Dept of Medicine, The University of Chicago, 5841 S. Maryland Ave. Chicago, IL 60637, USA. E-mail: [deji@uchicago.edu](mailto:deji@uchicago.edu)

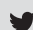

@ERSpublications

**Patients with chronic hypersensitivity pneumonitis and telomere lengths above the first quartile may have improved survival with mycophenolate therapy.** <https://bit.ly/3maRXih>

**Cite this article as:** Adegunsoye A, Morisset J, Newton CA, *et al.* Leukocyte telomere length and mycophenolate therapy in chronic hypersensitivity pneumonitis. *Eur Respir J* 2021; 57: 2002872 [<https://doi.org/10.1183/13993003.02872-2020>].

This single-page version can be shared freely online.

## To the Editor:

Recent prospective clinical trials have shown antifibrotic therapies slow lung function decline in patients with idiopathic pulmonary fibrosis (IPF) [1, 2] and progressive fibrosing interstitial lung disease (ILD). Similar findings were demonstrated in scleroderma-associated ILD [3], despite use of the immunosuppressive therapy mycophenolate mofetil (MMF). Prospective data for the treatment of other forms of ILD, such as chronic hypersensitivity pneumonitis (CHP) are lacking. Our groups previously reported that the treatment of CHP with MMF was associated with a decreased incidence of adverse events, a reduction in prednisone dose, and improved lung function when compared to prednisone alone [4, 5], but prospective studies are needed to confirm these findings. Short leukocyte telomere length (TL) is associated with increased mortality in patients with ILD, including CHP and IPF [6–8]. A recent investigation also showed TL may influence the response to immunosuppressive therapy. In that study, patients with IPF and short TL had a higher risk of death, lung transplantation and forced vital capacity (FVC) decline, when exposed to immunosuppressive therapy, including MMF [9]. In this investigation we sought to determine whether similar findings occurred in patients with CHP. We hypothesised that patients with CHP and short TL would experience a higher prevalence of death and disease progression when compared to those with longer TL.
